# Supplementary material for: Human Platelet Lysate Induces Antiviral Responses against Parechovirus A3
Source: Viruses. 2022 Jul 8;14(7):1499. doi: 10.3390/v14071499 (PMC9316291; doi:10.3390/v14071499)
Supplement: Supplementary file 1 [file viruses-14-01499-s001.zip › viruses-1646252-supplementary.pdf]

## Supplementary information

**Table S1. Quality control of human platelet lysate.**

| Item          | Specification         | Result                |
|---------------|-----------------------|-----------------------|
| Appearance    | Yellow to Buff liquid | Yellow to Buff liquid |
| Total protein | 4.0-8.0 g/dL          | 6.2 g/dL              |
| Endotoxin     | ≤ 10 EU/ml            | < 0.01 EU/ml          |
| Sterility     | Pass                  | Pass                  |
| Mycoplasma    | Negative              | Negative              |
| pH            | Tested                | 7.7                   |
| Osmolality    | 275-355 mOsM/kg       | 315 mOsM/kg           |

**Table S2. q-PCR primers used in this study.**

| Gene         | Sequences (5' - 3')                                                   |
|--------------|-----------------------------------------------------------------------|
| DENV-2 5'UTR | F: AGT TGT TAG TCT ACG TGG ACC GA<br>R: CAA GAG AGG GAC CCA CAT CG    |
| Gapdh        | F: TGC ACC ACC AAC TGC TTA GC<br>R: GGC ATG GAC TGT GGT CAT           |
| Ifn-a        | F: CCT CGC CCT TTG CTT TACT G<br>R: CAG AGA GCA GCT TGA CTT GCA       |
| Ifn-b        | F: TGA GCA GTC TGC ACC TGA AA<br>R: GCT TGA AGC AAT TGT CCC GT        |
| Il-1a        | F: TGT ATG TGA CTG CCC AAG ATG AA<br>R: TGG GTA TCT CAG GCA TCT CCT T |
| Il-1b        | F: ATG GCT TAT TAC AGT GGC AA<br>R: GTC GGA GAT TCG TAG CTG GA        |
| Il-18        | F: TCT TCA TTG ACC AAG GAA ATC GG<br>R: TCC GGG GTG CAT TAT CTC TAC   |
| Irf3         | F: TTC CCG GGA GGG ATA AGC<br>R: GGG CAG AGC GGA AAT TCC              |
| Irf7         | F: TCC CCA CGC TAT ACC ATC TAC CT<br>R: ACA GCC AGG GTT CCA GCT T     |
| Mxa          | F: GCT ACA CAC CGT GAC GGA TAT GG<br>R: CGA GCT GGA TTG GAA AGC CC    |

**Figure S1**

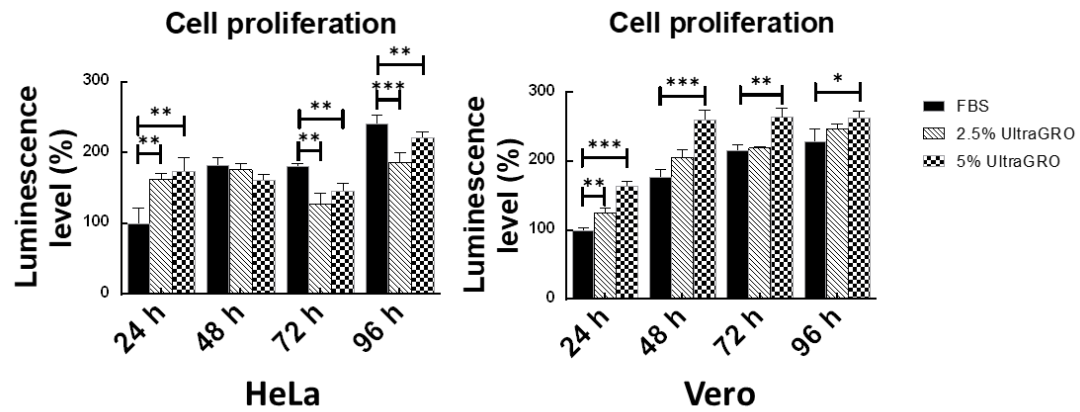

Figure S1. Cell proliferation assay in HeLa and Vero cells cultured with FBS and hPL mediums. (A) Cell-Titer Glo assay was investigated in HeLa (left panel) and Vero (right panel) cells maintained in FBS, 2.5% and 5% hPL mediums for 24 h - 96 h. Data are mean  $\pm$  SD of five independent experiments. Student's t-test, \*,  $p < 0.05$ , \*\*,  $p < 0.01$ , \*\*\*,  $p < 0.001$ .

**Figure S2**

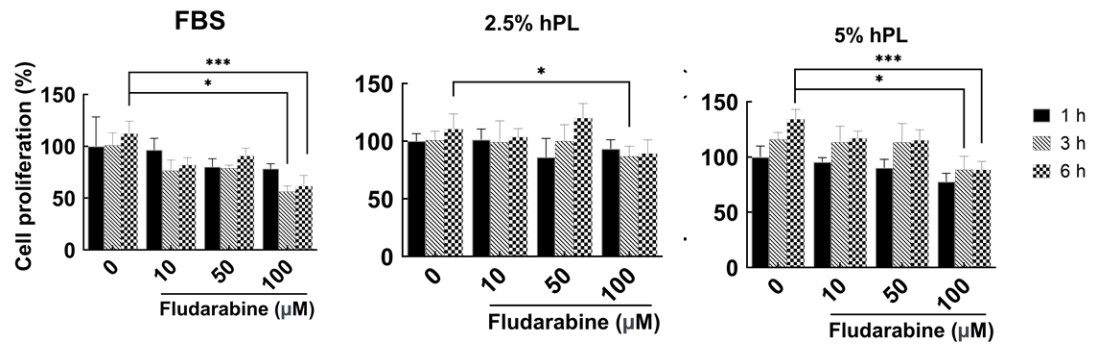

Figure S2. Cytotoxicity assay of fludarabine. FBS or hPL growth medium-cultured GBM cells were treated with 10, 50, 100 μM fludarabine for 1, 3, 6 h. Cell-Titer Glo assay determined the GBM cellular proliferation. Data are mean  $\pm$  SD of three independent samples. Student's t-test, \*,  $p < 0.05$ ; \*\*\*,  $p < 0.001$  compared.

**Figure S3**

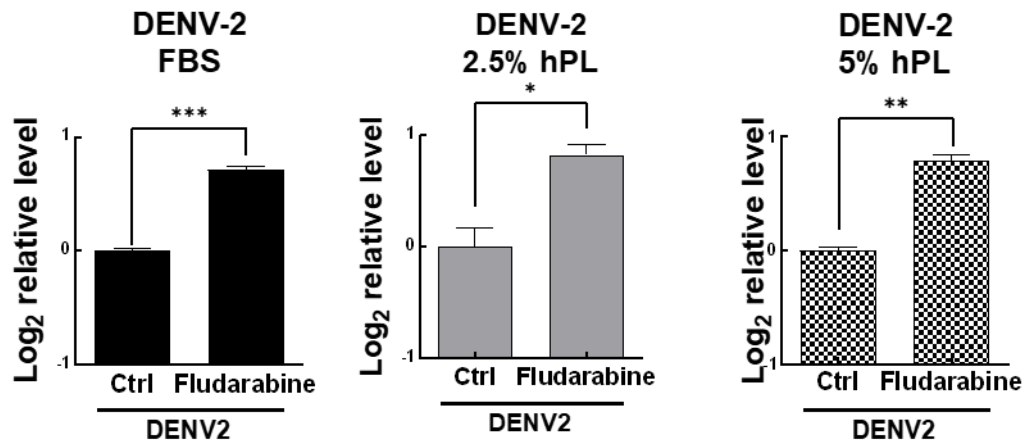

Figure S3. Enhanced DENV-2 5'UTR gene expression under blockade of STAT1 on DENV-2 infection of GBM cells. (A) GBM cells were pre-treated with fludarabine 50  $\mu$ M for 30 min under FBS or hPL medium. After treatment, GBM cells were then infected with DENV-2 at MOI = 2.5 for 6 h. Expression of DENV-2 5'-UTR gene were measured using real time qPCR. The level of DENV-2 5'-UTR was normalized to GAPDH. Data are mean  $\pm$  SD of three independent samples. Student's t-test, \*,  $p < 0.05$ ; \*\*,  $p < 0.01$  compared with PeV-A3-infected GBM cells under FBS or hPL mediums.
